# Supplementary material
Source: publisher figshare collection journal article supplement (https://acs.figshare.com/ndownloader/files/9433291)
Supplement: Supplementary file 1 [file 9433291]

Supporting Information for

Transition Metal-doped Metal Oxide  
Nanocrystals: Efficient Substitutional Doping  
Through a Continuous Growth Process

*Adam W. Jansons,<sup>†</sup> Kristopher M. Koskela,<sup>†</sup> Brandon M. Crockett, & James E. Hutchison\**

Department of Chemistry and Biochemistry and Materials Science Institute, University of  
Oregon, Eugene, Oregon 97403-1253, United States

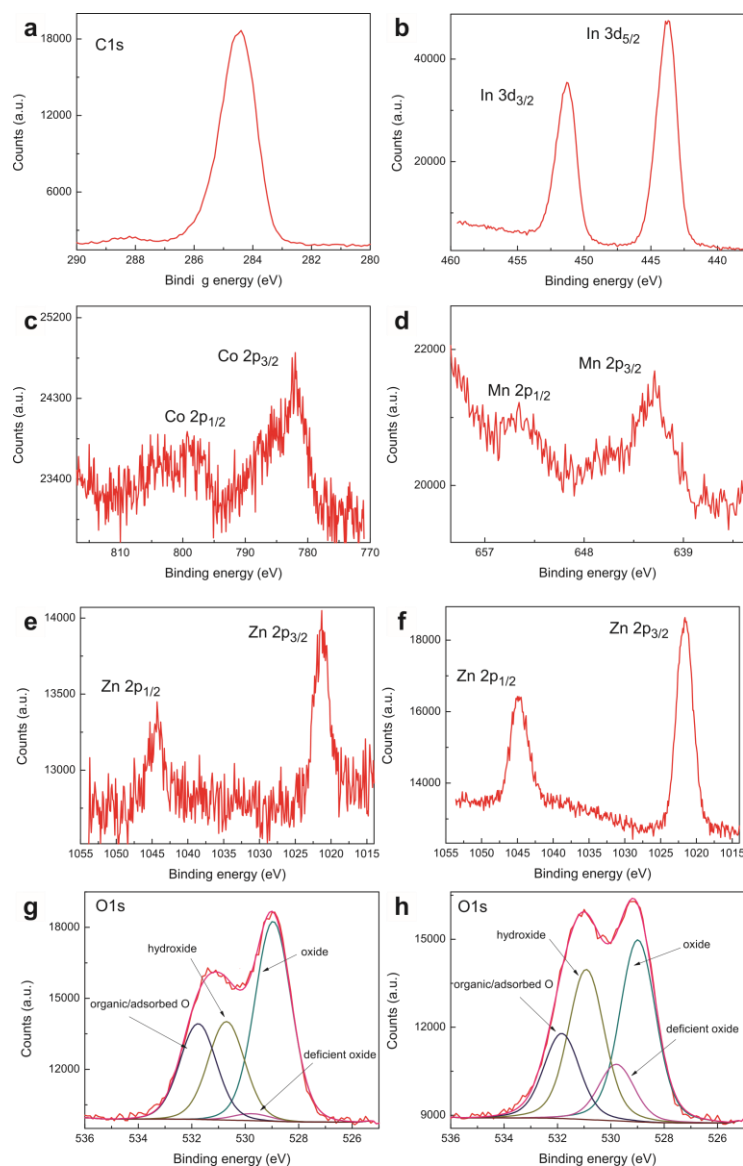

**Figure S1.** XPS spectra of doped  $\text{In}_2\text{O}_3$  nanocrystals. Compositions shown in Table 3 of the manuscript are calculated based on integration of the  $\text{In } 3d_{5/2}$  and dopant  $2p_{3/2}$  peak. **a)** displays a typical  $\text{C1s}$  spectra and **b)** a typical  $\text{In } 3d$  spectra of the doped and undoped nanocrystals. **c)** and **d)** show the  $\text{Co}$  and  $\text{Mn } 2p$  spectra from  $\text{Co: In}_2\text{O}_3$  and  $\text{Mn: In}_2\text{O}_3$  respectively. **e)** and **f)** display the  $\text{Zn } 2p$  region of 5%  $\text{Zn: In}_2\text{O}_3$  and 20%  $\text{Zn: In}_2\text{O}_3$ , respectively. **g)** displays the  $\text{O1s}$  spectra from 5%  $\text{Zn: In}_2\text{O}_3$ , and **h)** 20%  $\text{Zn: In}_2\text{O}_3$ . The  $\text{O1s}$  spectra shown in **g)** and **h)** can be fit to four peaks of the same peak shape and a width of 1.5 eV; the peak at 529.0 eV corresponds to oxide in  $\text{In}_2\text{O}_3$ , the peak 0.7 eV greater corresponds to oxygen deficient/defect oxide, the peak at 530.9 eV corresponds to hydroxide, and the peak at 531.8 eV corresponds to adsorbed oxygen and organic oxygen in the ligand shell.<sup>1–5</sup> The increase in dopant atom concentration likely leads to the increase in oxygen vacancy formation, which is displayed in **g)** and **h)**. Spectra are referenced to the  $\text{C1s}$  hydrocarbon peak at 284.5 eV.

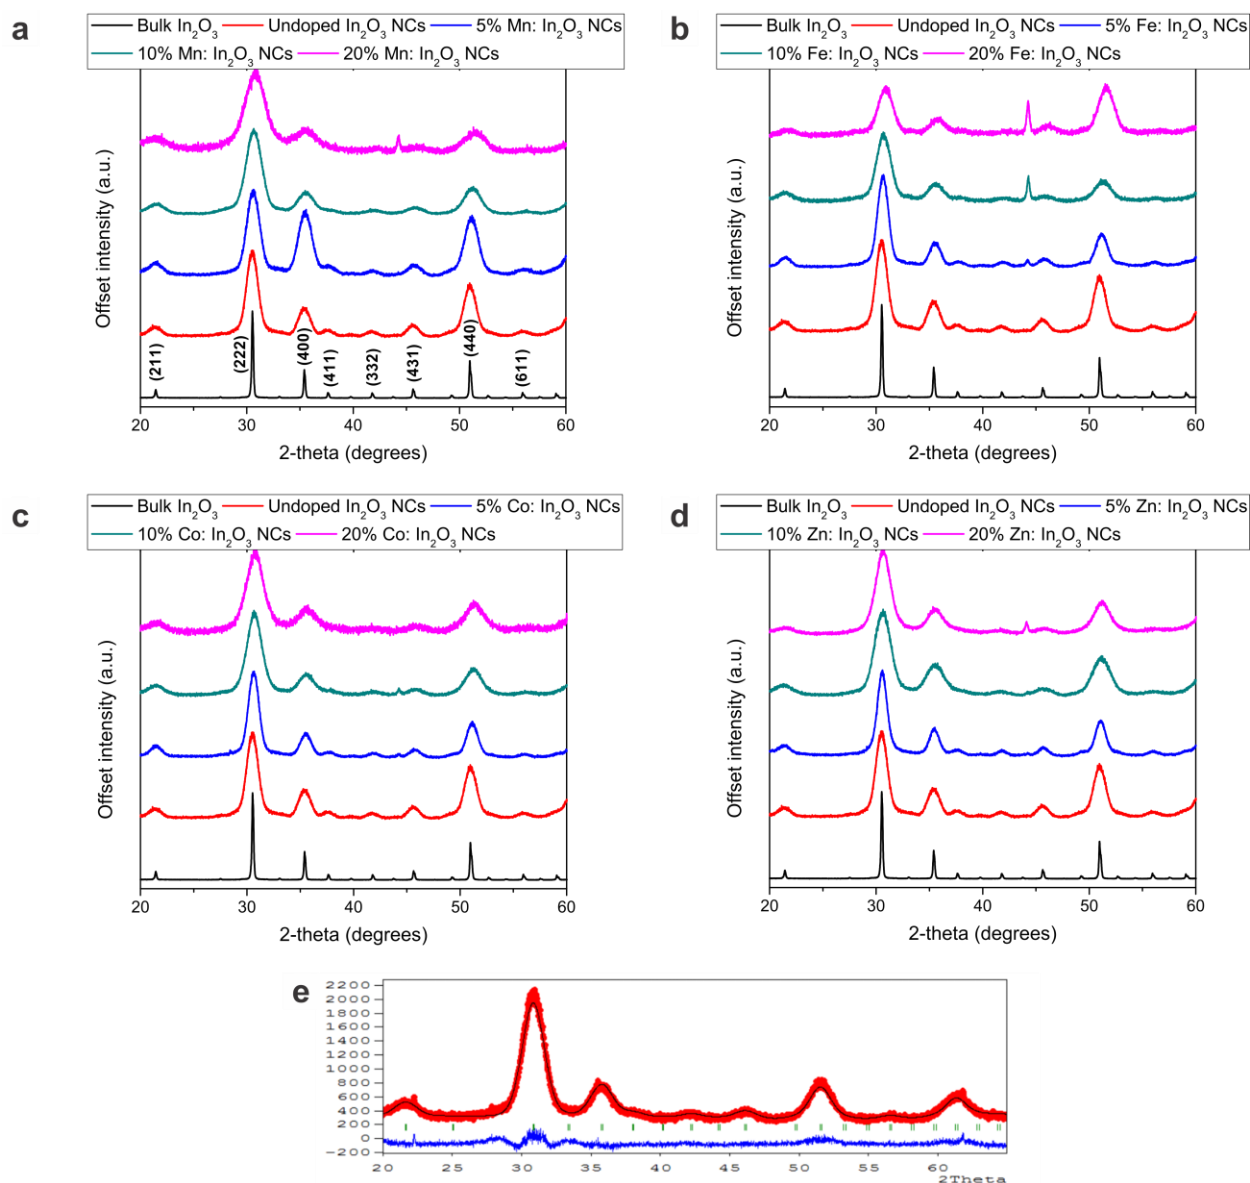

**Figure S2.** Raw XRD patterns acquired from undoped and doped  $\text{In}_2\text{O}_3$  nanocrystals at varying dopant concentrations, re-plotted from Figure 2 in the manuscript: **a)** Mn:  $\text{In}_2\text{O}_3$  **b)** Fe:  $\text{In}_2\text{O}_3$  **c)** Co:  $\text{In}_2\text{O}_3$  **d)** Zn:  $\text{In}_2\text{O}_3$ . The peak present at  $43.5^\circ$  in some samples is due to the silicon substrate. All acquired patterns match that of cubic  $\text{In}_2\text{O}_3$  (bulk pattern shown in black in each plot). **e)** Displays a typical Rietveld refinement using Fullprof Suite.<sup>6</sup> Background points were picked by hand, and peaks were fit using a pseudo-Voigt profile. Once scale, zero offsets, and peak shape were refined, lattice parameters were allowed to optimize. In XRD patterns where the substrate peak is present, an exclusion zone in the refinement was added to prevent model optimization from  $43\text{--}44^\circ$ .

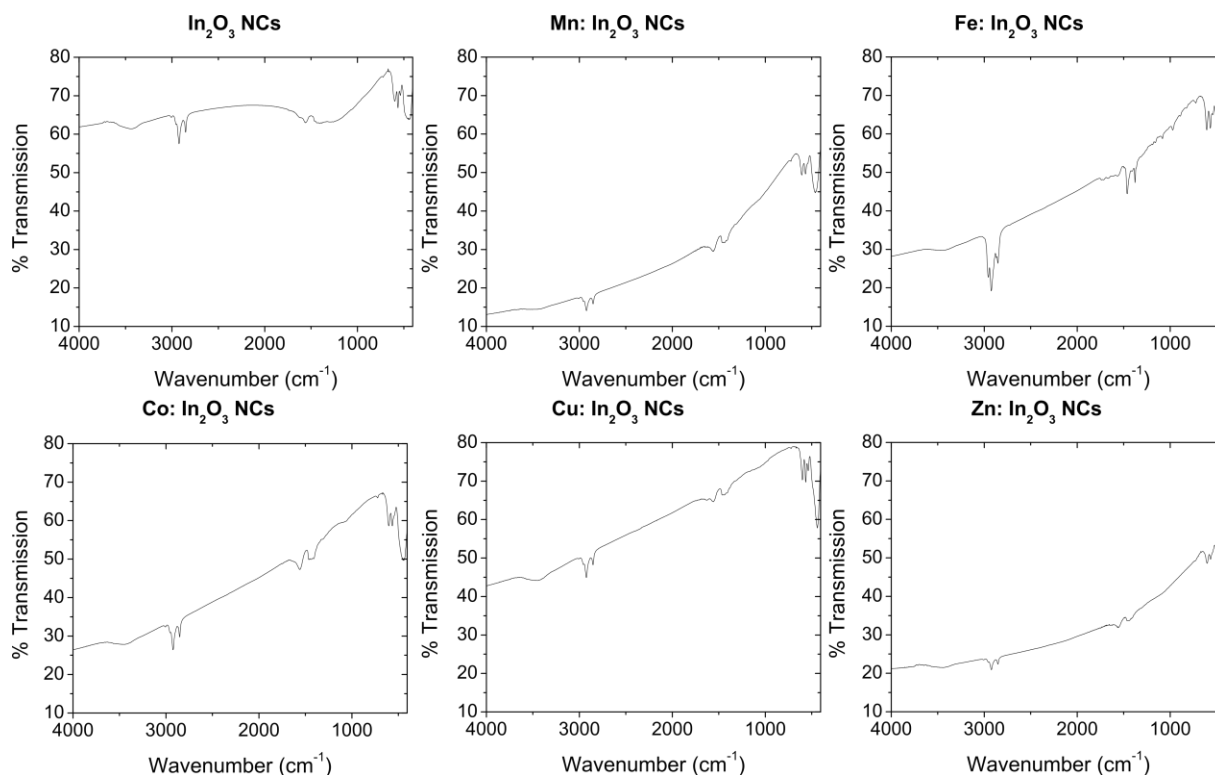

**Figure S3.** FTIR spectra obtained from undoped and doped  $\text{In}_2\text{O}_3$  nanocrystals. Unlike the undoped nanocrystals (top left), which display a weak plasmon resonance  $\sim 1400\text{ cm}^{-1}$ , the doped nanocrystals display much stronger plasmon absorbances centered at energies  $> 4000\text{ cm}^{-1}$ . The strong absorbance and the shift of the LSPR to higher energies is an indication of an increased concentration of oxygen vacancy formation.

#### References:

1. Zai, J., Zhu, J., Qi, R. & Qian, X. Nearly monodispersed  $\text{In}(\text{OH})_3$  hierarchical nanospheres and nanocubes: tunable ligand-assisted synthesis and their conversion into hierarchical  $\text{In}_2\text{O}_3$  for gas sensing. *J. Mater. Chem. A* **1**, 735–745 (2013).
2. Lin, A. W. C., Armstrong, N. R. & Kuwana, T. X-ray photoelectron/Auger electron spectroscopic studies of tin and indium metal foils and oxides. *Anal. Chem.* **49**, 1228–1235 (1977).

3. Kim, M.-G., Kanatzidis, M. G., Facchetti, A. & Marks, T. J. Low-temperature fabrication of high-performance metal oxide thin-film electronics via combustion processing. *Nat Mater* **10**, 382–388 (2011).
4. Berthold, T. *et al.* Consequences of plasma oxidation and vacuum annealing on the chemical properties and electron accumulation of In<sub>2</sub>O<sub>3</sub> surfaces. *J. Appl. Phys.* **120**, 245301 (2016).
5. Fan, J. C. C. & Goodenough, J. B. X-ray photoemission spectroscopy studies of Sn-doped indium-oxide films. *J. Appl. Phys.* **48**, 3524–3531 (1977).
6. Roisnel, T. & Rodríguez-Carvajal, J. WinPLOTR: a windows tool for powder diffraction pattern analysis. in *Materials Science Forum* **378**, 118–123 (Transtec Publications; 1999, 2001).
